# Supplementary material for: Electronic and magnetic properties of CoPc and FePc molecules on graphene: the substrate, defect, and hydrogen adsorption effects
Source: Royal Society of Chemistry journal article supplement (doi:10.1039/c8cp07091a), 2019-01-01
Supplement: c8cp07091a1.pdf [file c8cp07091a1.pdf]

**Supplementary Information for**

**“Electronic and magnetic properties of CoPc and FePc molecules on graphene:  
substrate, defect and hydrogen adsorption effects”**

Yu Wang,<sup>1,2, a)</sup> Xiaoguang Li,<sup>1, b)</sup> and Jinlong Yang<sup>3</sup>

*<sup>1)</sup>Institute for Advanced Study, Shenzhen University, Shenzhen 518060,  
China*

*<sup>2)</sup>Key Laboratory of Optoelectronic Devices and Systems of Ministry of Education and  
Guangdong Province, College of Optoelectronic Engineering, Shenzhen University,  
Shenzhen 518060, China*

*<sup>3)</sup>Hefei National Laboratory for Physical Sciences at the Microscale and  
Synergetic Innovation Center of Quantum Information and Quantum Physics,  
University of Science and Technology of China, Hefei, Anhui 230026,  
China*

---

<sup>a)</sup>Electronic mail: [yuwang@mail.ustc.edu.cn](mailto:yuwang@mail.ustc.edu.cn)

<sup>b)</sup>Electronic mail: [xgli@szu.edu.cn](mailto:xgli@szu.edu.cn)

## S1. Active orbital of free FePc calculated by CASSCF

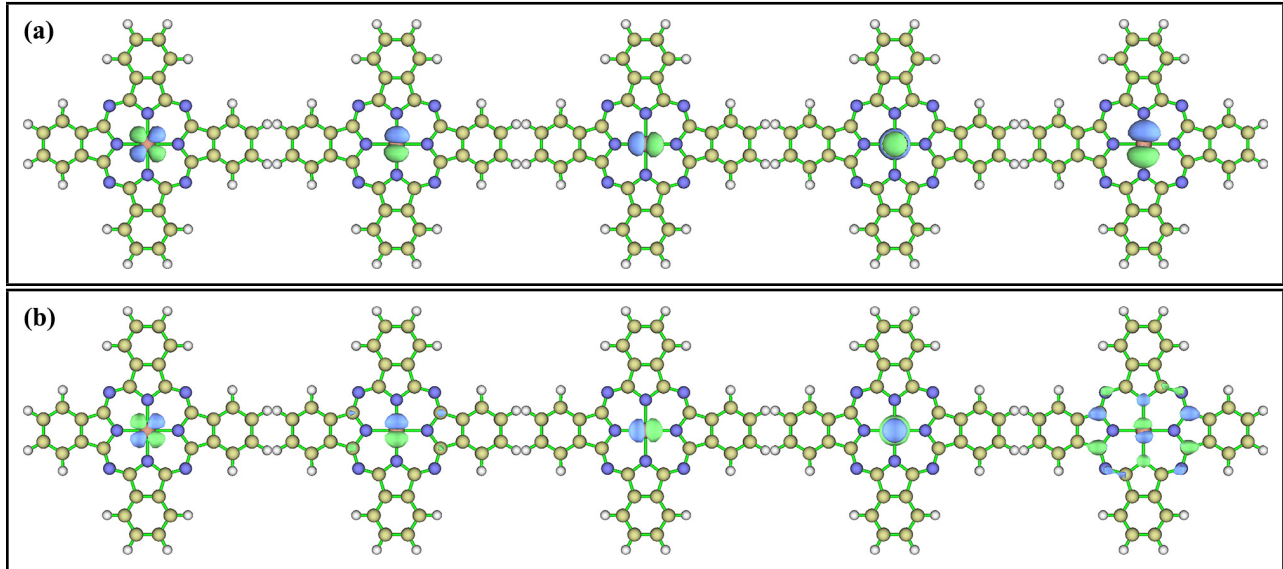

Figure S1. The upper and lower panels show the five active orbital of free FePc include predominant  $d$  atomic orbital character as calculated by the CASSCF method including (a) six triplets and one singlet or (b) three quintets, six triplets and one singlet states. Obviously, the last active orbital in (b) contains less  $d$  atomic orbital character than others. The default isovalue is 0.05 a.u. The molecular orbitals are rendered by Multiwfn.<sup>1</sup>

## S2. PDOS of the $3d$ orbitals in the Fe ion in FePc/G

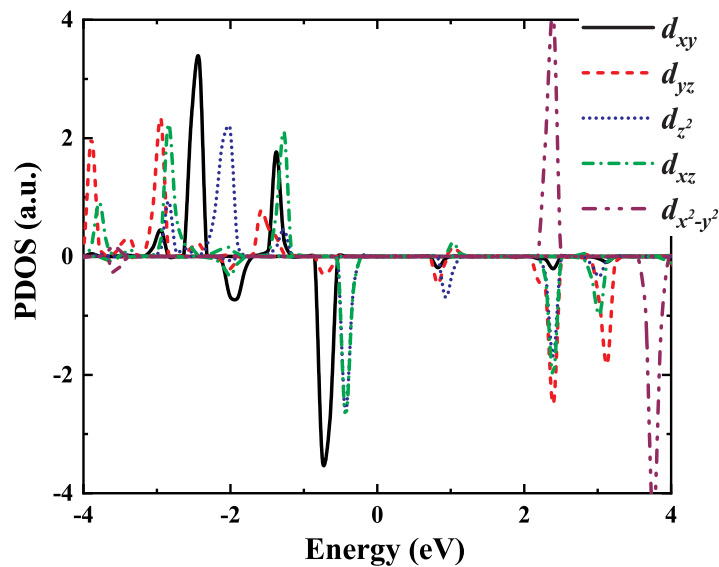

Figure S2. The spin-polarized PDOS of five  $3d$  orbitals of the Fe ion in the FePc/G composite.

### S3. Spin density of the H-FePc/G/Au(111) composite

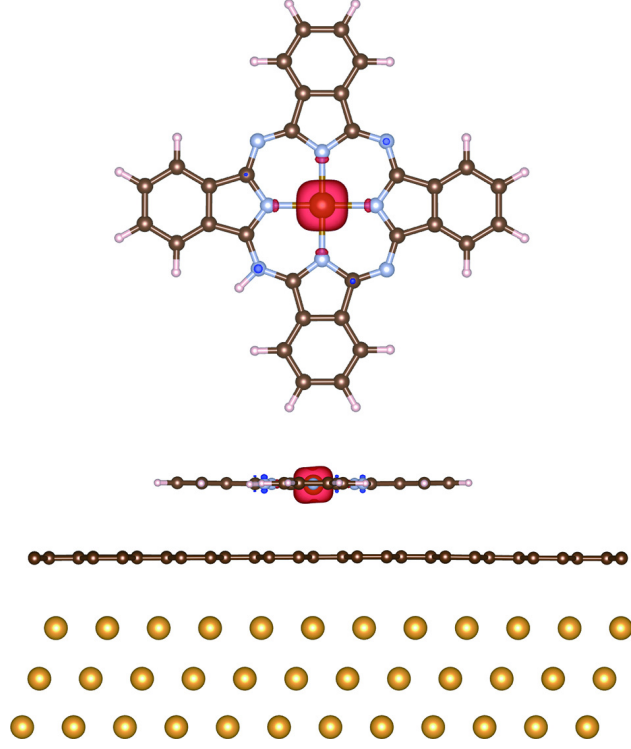

Figure S3. The spin density distribution in the H-FePc/G/Au(111) composite. Red (blue) symbols correspond to the majority (minority) spin. The isovalue for the spin density is  $0.01 \text{ \AA}^{-3}$ .

### S4. Kondo temperature of the SU(4) symmetrical Anderson model

The closed analytical expression for the Kondo temperature of the SU(4) symmetrical Anderson model derived in Ref. 2 via a path integral approach is

$$k_B T_{K, \text{SU}(4)} = U_1 f \left( \frac{\epsilon_1}{U_1} \right) \left[ \frac{-2J_1 U_1}{\pi \epsilon_1 (\epsilon_1 + U_1)} \right]^{\frac{1}{4}} \exp \left[ \frac{\pi \epsilon_1 (\epsilon_1 + U_1)}{2J_1 U_1} \right]$$

with

$$f(x) = [-x(x+1)^3]^{\frac{1}{4}} \exp [g(x)]$$

and

$$g(x) = \frac{3x-2}{4(x+2)} - \frac{x^2(x^2+3x+3)}{2(x+2)^2} \ln \left( \frac{2x+3}{x+1} \right)$$

## REFERENCES

<sup>1</sup>T. Lu and F. Chen, J. Comput. Chem. **33**, 580 (2012).

<sup>2</sup>M. Filippone, C. P. Moca, G. Zaránd, and C. Mora, Phys. Rev. B **90**, 121406 (2014).
